# Supplementary material
Source: Research Square preprint supplement (doi:10.21203/rs.3.rs-10116583/v1)
Supplement: Supplementary file 1 [file dbb496a43754b07e94762259.docx]

**Three versus seven days of apramycin treatment for post-weaning diarrhoea in piglets: a cluster-randomised non-inferiority field trial**

Emma Smedsgaard Byskov¹, Laura Goncalves Pereira¹, Mattia Pirolo¹, Ken Steen Pedersen¹, Luca Guardabassi¹, Peter Damborg¹*

*¹Department of Veterinary and Animal Sciences, University of Copenhagen, 1870 Frederiksberg C, Denmark*

* Correspondence: [pedam@sund.ku.dk](mailto:pedam@sund.ku.dk)

Running title: Apramycin Treatment Duration in Diarrheic Piglets

**Supplementary Material**

**
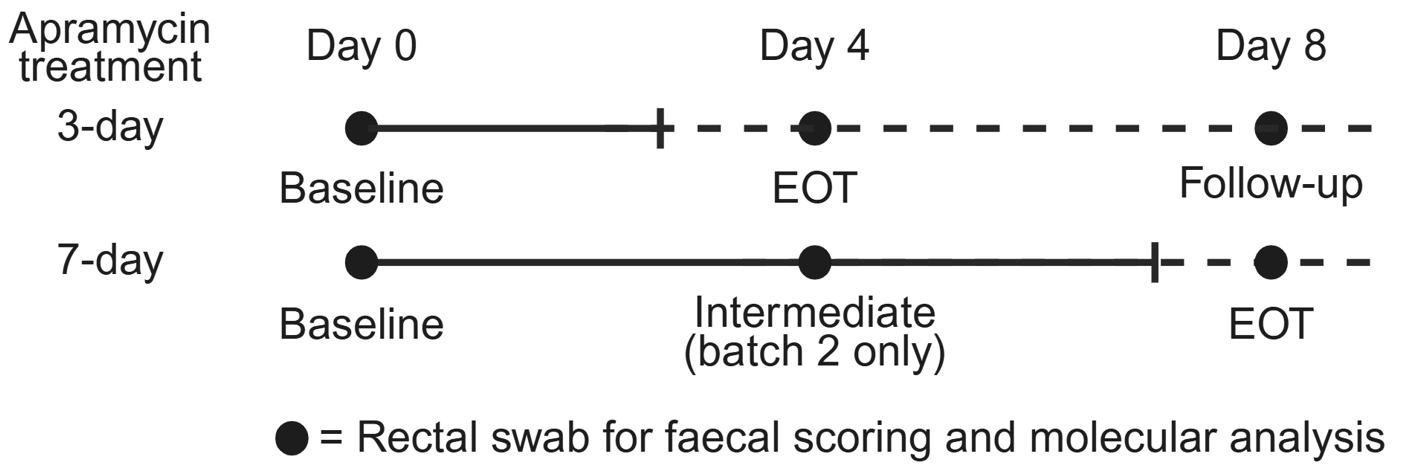
**

**Supplementary Figure S1. Study design, sampling schedule, and analytical workflow.**Piglets from one herd were enrolled in two batches (14 pens each) and randomised (1:1) to 3- or 7-day apramycin treatment. Rectal swabs were collected at baseline (Day 0), Day 4, and Day 8. EOT occurred at Day 4 (3-day group) and Day 8 (7-day group). Selected samples were pooled at pen level and analysed by qPCR for *aac(3)-IV* relative to 16S.

**Supplementary Table S1. Screening of candidate herds for inclusion in the apramycin treatment-length trial**

| **Herd** | **Visit date** | **Clinical pattern of PWD** | **Diagnostic findings (summary)** | **Apramycin susceptibility context** | **Suitability assessment** |
| --- | --- | --- | --- | --- | --- |
| **Farm A** | 25 Aug 2025 | Very low incidence of diarrhoea 1–2 days post-weaning | Haemolytic E. coli F18 isolated without enterotoxin genes (non-ETEC). F4 detected by PCR but not isolated | F18 isolate resistant (MIC >64 µg/mL) | Low clinical incidence and unclear ETEC involvement; unsuitable for trial |
| **Farm B** | 23 Sep 2025 | Mild and sporadic diarrhoea 9–13 days post-weaning; few clinically affected piglets | Haemolytic F18 ETEC detected (STa/STb toxins) | Susceptible (MIC 4 µg/mL) | Clinical incidence too low to reach target sample size |
| **Farm C** | 07 Oct 2025 | Reported recurrent PWD outbreaks affecting ~⅓ of nursery section | Haemolytic F18 detected; isolates toxin-negative in follow-up sampling | Resistant isolates detected (MIC >64 µg/mL) | High clinical incidence but unclear toxin profile and inconsistent diagnostics |
| **Farm D** | 09 Dec 2025 | Consistent PWD affecting most pens 3–4 days post-weaning | Haemolytic E. coli isolated. Batch 1 diagnostics identified F4-positive ETEC (ST1/ST2 toxins); batch 2 diagnostics identified both F4-positive and F18-positive ETEC | Mixed susceptibility pattern (F4 susceptible; F18 resistant) | Selected herd: consistent clinical outbreaks, sufficient case load, and logistical feasibility for trial |

**Supplementary Table S2. Herd-level diagnostic findings in the selected herd during the study period**

| **Batch** | **Sampling context** | **Isolate ID** | **Pathotype** | **Toxin profile** | **Apramycin MIC (µg/mL)** | **Interpretation** |
| --- | --- | --- | --- | --- | --- | --- |
| Batch 1 | Pre-study (Dec 2025) | Isolate 1 | F4-positive ETEC | STa + STb | 8 | Susceptible |
| Batch 2 | Inclusion (Jan 2026) | Isolate 1 | F4-positive ETEC | STa + STb | 4 | Susceptible |
| Batch 2 | Inclusion (Jan 2026) | Isolate 2 | F18-positive ETEC | LT | >64 | Resistant |
| Batch 2 | Inclusion (Jan 2026) | Isolate 3 | F18-positive ETEC | LT | >64 | Resistant |
